# Supplementary material for: Epigenetic Modifications in Placenta are Associated with the Child's Sensitization to Allergens
Source: Biomed Res Int. 2019 Apr 17;2019:1315257. doi: 10.1155/2019/1315257 (PMC6500694; doi:10.1155/2019/1315257)
Supplement: Supplementary Materials — Supplementary Table 1 A. Histopathology according to sex of the child. Supplementary Table 1 B. Sensitization during childhood according to sex of the child in relation to placenta histopathology. Supplementary Table 2. Histone acetylation levels in 173 placentas in the different lifestyle groups, and in girls and boys within each group. Supplementary data table. Demographic and histone acetylation data (database). [file 1315257.f1.zip]

Archive with 2 entries (2 files):
- biomed research international - supplementary data table_2019-03-13_BMRI_2710578.xlsx
- biomed research international - supplementary tables 1 & 2_2019-03-13_BMRI_2710577.docx
