# Supplementary material for: Epigenetic Modifications in Placenta are Associated with the Child's Sensitization to Allergens
Source: Biomed Res Int. 2019 Apr 17;2019:1315257. doi: 10.1155/2019/1315257 (PMC6500694; doi:10.1155/2019/1315257)
Supplement: Supplementary Materials — Supplementary Table 1 A. Histopathology according to sex of the child. Supplementary Table 1 B. Sensitization during childhood according to sex of the child in relation to placenta histopathology. Supplementary Table 2. Histone acetylation levels in 173 placentas in the different lifestyle groups, and in girls and boys within each group. Supplementary data table. Demographic and histone acetylation data (database). [file 1315257.f1.zip › biomed research international - supplementary data table_2019-03-13_BMRI_2710578.xlsx]

## Sheet: dataset
Supplementary data table. Demographic and histone acetylation data (database).
Lifestyle	Sex	Birth weight (gr)	Gestational age in weeks	Child sensitized to food allergens at 6 months	Child sensitized to food allergens at 12 months	Child sensitized to food allergens at 2 years	Child sensitized to food allergens at 5 years	Child sensitized to aeroallergens at 6 months	Child sensitized to aeroallergens 12 months	Child sensitized to aeroallergens at 2 years	Child sensitized to aeroallergens at 5 years	Maternal age (years)	Parity	Mother sensitized to aeroallergens	Father sensitized to aeroallergens	H3 histone acetylation - CD14	H4 histone acetylation - CD14	H3 histone acetylation - FOXP3	H4 histone acetylation - FOXP3	H3 histone acetylation - HDAC4	H4 histone acetylation - HDAC4	H3 histone acetylation - IFNG	H4 histone acetylation - IFNG	H3 histone acetylation - IL13	H4 histone acetylation - IL13	H3 histone acetylation - SH2B3	H4 histone acetylation - SH2B3
Partly anthroposophic	Female	3345	40	No	No	No	No	No	No	No	No	32	First	No	No	0.0202862	0.578075	0.0005	0.0005	0.0005	2.94799	0.0005	0.0005	0.0005	0.0005	0.0005	0.315373
Partly anthroposophic	Female	4600	41	No	No	No	No	No	No	No	Yes	33	Second	No	No	0.805272	0.237018	0.0005	0.857762	0.0005	0.0932314	0.0005	0.0005	0.0005	0.0005	0.151381	0.0005
Non-anthroposophic	Male	3455	38	No	No	Yes	No	No	No	No	No	36	Second	No	Yes	0.38563	0.239947	3.094	0.0103941	0.0005	0.408433	0.0005	0.0005	0.0005	0.0192065	0.040786	0.163539
Partly anthroposophic	Male	3535	41	No	No	No	No	No	No	No	Yes	33	Second	No	Yes	0.00749724	0.0005	1.58338	0.0005	0.0990326	0.0005	0.0793874	0.0959209	0.0204152	0.0176411	0.0005	0.0005
Non-anthroposophic	Female	3470	39	No	No	No	Yes	No	No	No	Yes	28	Second	Yes	Yes	0.716135	0.401156	0.0005	0.026208	0.0005	0.265906	0.0005	0.0282581	0.0005	0.289825	0.0005	0.321363
Partly anthroposophic	Male	3120	38	No	No	No	No		No	No	No	38	Second	No	No	2.25291	0.30771	0.92226	0.0941712	1.77277	1.38726	0.0495646	0.035099	2.60895	0.267205	0.643977	0.256437
Partly anthroposophic	Male	3500	40	No			No				No	36	Second	Yes	No	0.33944	0.595485	0.0310914	0.0489568	1.55247	2.21562	0.0315438	0.0210065	0.128355	0.0828369	0.0005	0.399753
Partly anthroposophic	Female	3335	40	Yes	Yes	Yes	Yes	No	No	Yes	Yes	29	First	No	Yes	0.0005	0.0005	0.00735486	0.0005	0.612651	0.138494	0.0005	0.0005	0.0110324	0.00210998	0.344625	0.073072
Partly anthroposophic	Male	2660	39	No	No	No	No	No	No	No	No	37	Second	No	Yes	0.917066	0.197753	0.441192	0.0246858	0.505876	0.889476	0.238957	0.0107758	0.0005	0.0005	0.496887	0.0111214
Non-anthroposophic	Male	4270	40	No	Yes	Yes		No	No	Yes		33	First	No	No	0.0005	1.26584	7.09667	0.427651	0.0005	2.27472	0.0005	0.108755	0.0005	0.0005	0.0005	0.346126
Partly anthroposophic	Female	3950	40	No	No	No		No	No	No		26	Second	No	No	1.6134	0.231779	0.0005	0.0005	1.00587	1.07179	0.220373	0.011634	0.240937	0.917683	0.794419	0.132512
Non-anthroposophic	Male	4790	40	No	No	No		No	No	No		23	Second	No	No	0.018066	0.0699964	0.0880713	0.0005	0.0280689	0.306294	0.0982741	0.0005	0.786735	0.164246	0.0005	0.0005
Partly anthroposophic	Male	3425	42	No	No	No	No		No	No	No	33	First	Yes	No	0.516755	0.140805	0.051617	0.0005	0.447107	1.11981	0.0608845	0.0828536	0.184334	0.750176	0.162545	0.165227
Partly anthroposophic	Male	3400	40									23	First	No	No	1.86449	8.77812	3.38667	4.56288	5.03023	0.0005	0.0200864	0.632709	8.22041	4.32021	0.697479	5.51961
Partly anthroposophic	Female	3530	40	No	No	No	No	No	No	No	No	31	First	Yes	No	2.68813	0.742668	1.85954	0.155484	2.8033	1.92297	0.962603	0.0434317	0.0005	0.0005	2.37757	0.406
Partly anthroposophic	Female	3890	40	No	No	No	No	No	No	No	No	25	First	No	No	0.0005	0.290659	0.0005	0.0005	0.543711	1.17903	0.0005	0.0005	0.0005	0.0119694	0.0134381	0.0471173
Non-anthroposophic	Female	3355	38	No	No	No	No	No	No	No	No	28	First	No	No	0.0005	0.198304	0.0481681	0.0399134	0.177392	1.04258	0.0188979	0.0005	0.161079	0.770991	0.0361457	0.125654
Non-anthroposophic	Male	3260	39	No	No	No		No	No	No		24	Second	No	Yes	0.0005	0.505634	0.0005	0.0134588	9.2907	1.51261	1.39048	0.00333259	0.0005	0.149977	0.0005	0.0777598
Partly anthroposophic	Male	3510	39	No				No				28	Second	No	No	0.803051	0.0005	0.360031	0.038969	0.490014	3.69981	0.0005	0.0234058	0.158815	0.068822	0.0005	0.0527607
Partly anthroposophic	Female	3200	39	No	No	No	No	No	No	No	No	30	Second	No	Yes	0.758469	0.259408	0.343531	0.00902856	0.290611	1.05913	0.0528255	0.00765134	0.0005	1.06989	0.577984	0.0503188
Non-anthroposophic	Female	4515	41	No	No	No	No		No	No	No	26	Second	Yes	No	0.0005	0.0005	0.0269135	0.246743	0.0123616	0.426516	0.00205925	0.0952381	0.0005	0.37892	0.0005	0.252992
Partly anthroposophic	Male	3905	39		No	No			No			27	Second	No	Yes	0.485079	0.0117242	0.412512	0.0137143	0.916583	0.801277	0.140466	0.00329021	1.51357	0.00964498	1.67026	0.138381
Partly anthroposophic	Female	3430	40	No	Yes	No		No		No		36	First	Yes	No	0.0005	0.0005	0.0005	0.0523288	1.19074	0.992439	0.0603261	0.00623624	0.0005	0.0005	0.115962	0.0131279
Partly anthroposophic	Female	3315	38	No	No		No	No	No		No	29	First	No	No	0.237763	0.276716	0.203469	0.161981	0.318793	3.26483	0.138708	0.050485	0.0005	1.49208	1.86092	3.34467
Anthroposophic	Female	4650	40	No	No	No	No		No	No	No	23	Third	No	No	0.238624	0.148944	0.237777	0.115758	0.887014	0.33608	0.0940463	0.0456335	0.0005	0.0005	0.823549	0.845317
Non-anthroposophic	Female	3975	41	No	No	No	No	No	No	No	No	29	Second	No	No	0.14921	0.0158046	0.200722	0.015645	1.2623	0.134494	0.0498012	0.0075805	0.0005	0.187584	5.39453	0.113066
Partly anthroposophic	Male	4415	41	No		No	No	No		No	No	36	Second	No	No	0.251335	0.0286496	0.0161176	0.0146266	0.89687	1.20344	0.150958	0.00733603	0.0005	0.0005	2.12424	0.271422
Partly anthroposophic	Female	2930	40	No	No	No	No	No	No	No	No	33	Second	Yes	No	0.28677	0.061938	0.0236234	0.0368599	0.374797	0.650176	0.0005	0.01967	0.0005	0.570522	1.24736	0.953239
Partly anthroposophic	Male	3190	38	No	No	No	No		No	No	No	31	First	Yes	Yes	0.103719	0.550922	0.0355008	0.00350059	0.208493	0.0727191	0.0005	0.0005	0.0005	0.0525306	0.12979	0.0395238
Partly anthroposophic	Female	4300	42	No	No	No		No	No	No		36	Second	No	No	0.365185	0.0587082	0.517352	0.028671	1.06933	1.15953	0.138168	0.0121107	0.0005	0.0005	4.4726	0.528807
Partly anthroposophic	Male	4900	42	Yes	Yes	Yes	Yes	No	No	No	Yes	29	Second	Yes	Yes	0.534397	0.234168	0.333619	0.0566361	3.28172	0.701506	0.157237	0.0345571	0.951997	0.245523	0.489648	0.330397
Non-anthroposophic	Female	3300	38	No	No	No	No	No	No	No	No	33	Second	No	No	0.500584	0.0005	0.0005	0.0005	0.0005	0.00866886	0.0005	0.0005	0.0005	0.00538204	0.0005	0.0005
Partly anthroposophic	Male	3140	36	No	No		No	No	No		No	19	First	Yes	No	0.470823	0.0147008	0.619468	0.0703409	0.717418	1.08585	0.218041	0.114217	0.0005	0.0005	0.928484	0.18155
Anthroposophic	Female	2950	38	No	No	No	No	No	No	No	No	28	Third	No	Yes	0.389166	0.897734	0.0005	0.0005	0.0005	0.0005	0.0005	0.0005	0.0005	0.0005	0.0005	0.0005
Non-anthroposophic	Male	4670	40	Yes	Yes	Yes		No	Yes	Yes		29	First	No	No	0.0736716	0.0191894	0.369086	0.069961	1.1862	1.45099	0.286985	0.00923438	0.0005	0.7458	0.4603	0.168519
Anthroposophic	Female	2350	36				No				No	38	Third	No	No	0.0116895	0.0245218	0.261641	0.0372339	1.53532	3.32585	0.0005	0.00403664	1.01088	0.233068	0.00225985	0.0005
Non-anthroposophic	Female	3325	40	No	No		No	No	No		No	22	Second	Yes	No	2.7361	0.131436	5.25478	0.123894	0.0005	6.14483	1.79361	0.0178609	1.82224	0.188833	0.0005	1.27416
Non-anthroposophic	Female	4045	40	Yes	Yes	Yes	Yes	No	No	No	Yes	35	Second	No	No	3.35824	0.802855	0.0005	0.0005	5.46686	0.0005	0.0005	0.0192693	0.0005	0.108573	0.175365	0.0005
Anthroposophic	Male	3500	39									31	Third	Yes		0.0005	0.0780657	0.0656334	0.0726357	0.83399	1.80216	0.0224306	0.0252282	0.0387677	0.0361889	0.081522	0.624327
Partly anthroposophic	Female	3840	40	No	No		No	No	No		No	24	First	No	Yes	0.372001	0.0360165	0.258339	0.0294363	1.37755	1.64945	0.195089	0.0005	0.608792	0.0375434	1.1451	0.175251
Non-anthroposophic	Male	3360	39	No				No				32	First	Yes	Yes	8.22569	5.96467	0.0005	4.88734	0.0005	0.0005	3.78779	0.590028	0.0005	2.47961	0.0005	0.0005
Partly anthroposophic	Female	3655	41									24	First	No	Yes	0.0754279	0.011691	0.51268	0.0204754	1.00802	0.449671	0.0491623	0.00324176	0.230807	0.0868143	0.357783	0.0230311
Partly anthroposophic	Male	4000	43	No	No	No	No	No	No	No	No	34	Second	No	No	0.0005	0.293579	0.0005	0.0005	0.0005	0.0430643	0.0005	0.0005	0.0005	0.278507	0.0005	0.0977537
Partly anthroposophic	Female	3320	38	No	No	No	No	No	No	No	No	36	Second	No	No	0.555805	6.10581	0.359469	6.69356	2.2818	0.0005	0.438135	2.18282	2.19211	5.42452	1.17533	0.0005
Non-anthroposophic	Female	3075	39	No	No	No	No	No	No	No	No	31	First	No	Yes	0.369195	0.830536	0.181106	0.00838145	0.0005	1.90942	0.0005	0.0005	0.0005	0.0005	1.40225	1.3823
Partly anthroposophic	Female	3425	39	No	Yes	Yes	Yes	No	No	No	Yes	22	Second	Yes	Yes	0.202176	0.325752	0.0005	0.0140323	0.0005	0.00688483	0.0005	0.00225382	0.0005	0.0389182	0.0005	0.0005
Partly anthroposophic	Male	4055	42									31	Fourth	No	Yes	1.58899	3.27135	1.58804	1.58479	0.190409	0.0005	0.129453	0.595249	0.654078	2.08237	8.54475	0.0005
Partly anthroposophic	Female	3435	39				No				No	28	First	Yes		0.0005	0.0005	7.42637	0.0005	0.0005	0.0005	3.64836	0.0005	0.0005	0.0005	0.0005	0.0005
Partly anthroposophic	Female	3395	40	No				No				28	First	No	No	7.23135	4.33034	6.86243	3.98922	0.0005	0.0005	0.0005	1.01221	0.0005	0.502823	0.0005	0.0005
Anthroposophic	Female	3780	40	No	No	No	No			No	No	30	Third	Yes	No	0.0005	0.0754452	0.0005	0.114476	0.0649459	6.49254	1.49323	0.050139	0.49572	0.075147	0.0005	0.517384
Anthroposophic	Male	4330	40	No	No	No	No	No	No	No	No	32	Second	No	Yes	1.55716	0.448545	0.338126	0.0210674	0.0005	0.0378607	0.0005	0.0005	1.31877	0.0505069	5.50171	0.517064
Partly anthroposophic	Female	3770	42	No				No				20	First	No	No	0.310585	0.32104	0.193118	0.25987	0.212213	6.76722	0.112075	0.186027	0.51495	0.0005	0.34467	2.87093
Partly anthroposophic	Male	3100	40	No	No	No		No	No	No	No	36	First	No	No	0.137375	0.549042	0.0005	0.0005	0.0315722	0.0005	0.0005	0.0005	0.0005	0.0305229	0.0005	0.0005
Anthroposophic	Female	3480	38	No								20	First	No	No	0.0005	0.0005	0.0005	0.0005	0.0005	0.355213	0.0005	0.0005	0.0005	0.0568902	0.0005	0.0005
Partly anthroposophic	Male	4100	39	No		No	No			No	No	38	Second	No	No	0.315632	0.123197	0.270366	0.099007	1.35129	1.01649	0.265847	0.0352701	1.16084	0.4212	1.27777	1.20643
Partly anthroposophic	Female	3360	39	No	No	No	No	No	No	No	No	27	Second	No	No	2.23117	0.662168	2.6387	0.647499	5.46811	2.8616	2.64174	0.138778	4.03905	0.662963	9.02107	4.06646
Partly anthroposophic	Female	4050	40	No	No	No	No	No	No	No	No	35	Fourth	No	Yes	0.0967737	0.29295	0.199111	0.0122072	0.0005	0.787311	0.106016	0.014443	0.243452	0.0551591	0.388359	0.0131276
Non-anthroposophic	Female	4385	41	No	No	No		No		No		32	Third	No	No	3.04856	0.700529	4.03905	0.662963	0.0005	4.14238	0.583671	0.0005	0.0005	0.0005	1.35092	0.205993
Partly anthroposophic	Male	3750	41	No		Yes	No	No		No	No	23	First	Yes	No	3.04856	0.700529	4.03905	0.662963	0.0005	4.14238	0.583671	0.0005	0.0005	0.0005	1.35092	0.205993
Anthroposophic	Female	3585	40	No				No				39	First	No	No	0.0005	0.0005	0.0005	1.35895	0.373675	0.340685	0.0005	0.0005	0.575217	1.88333	1.57116	0.0005
Partly anthroposophic	Female	3920	40	No	No	No	No	No	No	No	No	23	Second	No	No	0.739694	0.261521	0.572332	0.100476	0.532181	1.08673	0.0005	0.0005	0.0149456	0.00455866	0.303827	0.182736
Anthroposophic	Female	3550	40									24	Second	No		0.987508	0.527668	0.0005	0.209043	0.0928463	1.07831	0.267369	0.0922764	0.399237	0.0005	0.0005	0.0005
Partly anthroposophic	Female	3945	41									23	First	No	Yes	0.0005	0.547147	0.0005	0.0433005	0.0005	1.61317	0.0005	0.0171744	0.0005	0.00126209	0.0005	0.104875
Partly anthroposophic	Male	3265	41	No	No	No	No	No	No	No	No	28	First	No		0.056202	0.775471	0.0005	0.0827679	0.174958	0.188584	0.0005	0.0211652	0.00353328	0.0215342	0.0005	0.116319
Partly anthroposophic	Male	4000	41	No	No	No	No	No	No	No	No	33	Second	Yes	Yes	1.279	1.61327	0.418546	0.0109672	0.0496691	0.0553752	0.120341	0.0005	0.153743	0.0059067	2.98587	0.206502
Partly anthroposophic	Female	3760	41	No	No	No		No	No	No		34	Third	No	No	0.0005	0.0005	8.22493	0.0429338	0.0005	0.00695255	0.0005	0.00387056	0.0005	0.882709	0.0005	0.0005
Partly anthroposophic	Female	3420	38	No	No	No	Yes	No	No	No	No	31	Second	No	Yes	0.00516629	0.515455	0.0005	0.0656022	0.0005	1.91103	0.0005	0.0005	0.010481	0.219275	0.0005	0.0728973
Partly anthroposophic	Female	4405	40	No	No	Yes	No	No	No	No	No	39	Third	No	Yes	0.0005	6.01686	0.0005	4.34661	0.0005	2.46209	0.0422928	0.0340228	0.768362	0.0005	0.0005	2.99878
Non-anthroposophic	Male	3600	40	Yes	Yes	Yes	Yes	No	No	Yes	No	21	First	No	No	2.92326	0.0005	0.247985	0.426204	0.0005	0.0005	0.286376	0.8531	0.00855499	0.338017	0.0005	0.0005
Anthroposophic	Male	3585	39		No	No	Yes		No	No	No	31	Second	No	No	0.03557	0.592542	3.57043	0.0005	0.0689428	2.05498	0.0005	0.263061	0.0005	0.0005	0.0005	0.0005
Partly anthroposophic	Male	3820	42	No	Yes	No	Yes	No	No	No	Yes	28	First	No	Yes	0.0326619	0.28852	0.0005	0.0005	0.143112	0.235475	0.0005	0.0005	0.0005	0.0005	0.00622255	0.0167484
Partly anthroposophic	Male	4480	41	No	No	No	No	No	No	No	No	33	Second	No	No	0.00120736	0.57688	0.0005	0.0005	0.0005	0.0005	0.097916	0.0005	0.0005	1.34806	0.0005	0.0005
Anthroposophic	Male	3230	41		No	Yes	No		No	No	No	35	First	Yes	No	0.112639	0.0005	1.09754	0.0005	0.0005	0.346342	0.0005	0.327476	0.0005	0.0005	0.0005	0.0005
Partly anthroposophic	Male	3670	38	No	No	No	No		No	No	No	27	First	No	Yes	0.0005	0.0005	0.138035	0.111674	2.52545	3.58339	0.0005	0.00872635	0.0005	0.269713	0.0005	0.0005
Partly anthroposophic	Female	4100	40	No	No	No	No	No	No	No	No	31	Second	No	Yes	2.70842	0.0775204	0.252764	0.0190717	0.0005	0.0249522	9.5629	1.66518	1.01907	0.0547994	0.0005	0.0005
Non-anthroposophic	Male	3515	39	No	Yes	No	Yes	No		No	Yes	25	Second	Yes	Yes	0.0369148	0.219245	0.130627	0.228675	0.0005	0.0295143	0.0005	0.0645745	0.0005	0.0381325	0.143699	2.98884
Partly anthroposophic	Male	4170	42	No	No	No	No		No	No	No	31	Second	No	Yes	2.18638	0.380908	1.43399	0.053693	0.0005	0.787907	0.0005	0.0005	0.0005	0.0005	0.0005	0.0005
Partly anthroposophic	Male	4020	41	No	No		Yes	No	No		No	32	Third	No	No	0.62789	0.228412	0.433782	0.0241469	0.418777	1.77726	0.0310597	0.0005	0.0005	0.075165	0.75507	0.050984
Non-anthroposophic	Male	3160	38	No	No	No	Yes	No	No	No	No	34	Third	No	Yes	0.551793	0.276239	0.0005	0.0561543	0.355855	1.42174	0.0005	0.0037331	2.71048	0.615713	1.45903	0.0190898
Partly anthroposophic	Male	3085	38	No	No	No	No	No	No	No	No	30	Third	Yes	Yes	0.0005	0.0005	1.1512	0.639067	0.0005	0.0346904	0.0005	0.151053	0.0005	0.13899	0.0005	0.0005
Partly anthroposophic	Male	5320	40		No	No	No		No	No	No	33	Second	Yes	Yes	2.7328	0.108372	0.921188	0.352556	1.14703	0.0754338	0.728342	0.823036	2.63885	0.173871	0.0106551	0.164573
Non-anthroposophic	Male	2905	38	No	No	No	No	No		No	Yes	27	Second	No		0.202305	0.412038	0.13591	0.0287386	0.262272	1.56002	0.0005	0.00709105	0.319704	0.0472357	2.58604	0.687616
Non-anthroposophic	Female	2980	40	No	No	No	No	No	No	No	No	29	First	Yes	No	0.92213	0.352021	0.209243	0.0226413	1.33506	4.19606	0.0819153	0.00664622	0.702535	0.0852507	3.05217	1.06306
Partly anthroposophic	Male	3260	39									23	Second	No	Yes	1.18705	0.538852	0.452613	0.0227713	0.45386	0.845217	0.115104	0.00956483	0.120952	0.0459108	0.0005	0.173264
Non-anthroposophic	Female	3645	39	No	No	No	No	No	No	No	No	34	First	No	Yes	0.0005	0.0005	0.0005	0.0005	0.0005	0.0005	0.0005	0.0005	0.0005	0.0005	0.0005	0.0005
Partly anthroposophic	Male	3405	40	No	No		No	No	No		Yes	34	First	Yes	Yes	0.0005	4.04353	0.212451	0.0005	1.56517	1.02701	0.0856307	0.0005	0.311227	0.0100589	0.0005	0.0638855
Partly anthroposophic	Female	3300	39	No	No	No	No	No	No	No	No	30	First	Yes	No	0.0005	1.00468	0.0005	0.0005	0.0005	0.389194	0.0005	0.0005	0.0005	0.0005	0.0005	0.0005
Non-anthroposophic	Female	4225	38	No	No	No		No	No	No		39	Fourth	No	No	1.46675	0.492706	0.0005	0.00584074	1.01	1.45563	0.0005	0.00404007	3.62913	0.233825	0.0005	0.0005
Partly anthroposophic	Male	4342	39	Yes	No	No		No	No	Yes		31	Second	Yes	Yes	0.863458	0.35484	0.479021	0.0586972	0.790983	0.132513	0.426352	0.0272123	0.275521	0.0005	4.31588	0.507896
Partly anthroposophic	Female	2886	38			No				No		32	Second	No	No	0.831495	0.140986	0.860155	0.201964	0.865702	2.14306	0.0005	0.0005	0.0005	0.0005	0.0488103	0.0005
Partly anthroposophic	Male	3735	41	No	No		No	No	No		No	31	First	Yes	No	3.46571	0.0005	0.475588	0.0005	0.642107	0.0005	1.11696	0.0005	0.0005	1.44073	0.0005	0.0005
Anthroposophic	Male	3710	41	No	No	No	No	No	No	No	No	30	First	Yes	No	0.408423	1.28711	0.048571	0.29603	1.09759	1.6634	0.0372449	0.165878	0.988318	0.554304	0.620787	3.49762
Partly anthroposophic	Male	3800	40	No	No	No	No	No	No	No	No	42	First	Yes		2.09784	1.5203	0.382445	0.208389	1.04894	1.25349	0.305079	0.0941717	0.0005	0.0005	0.35082	3.03336
Non-anthroposophic	Male	3765	40	No	No	No	No	No	No	No	No	35	Second	No	No	1.97802	0.440047	0.0005	0.008811	0.0005	0.349638	0.0005	0.0005	0.0005	0.0292174	1.2424	0.0005
Partly anthroposophic	Female	3970	40	No	No	No	No	No	No	No	Yes	35	Third	No	No	0.230026	0.492071	0.0005	0.00297803	0.0005	0.883839	0.0005	0.0005	0.0005	0.0403087	0.0005	0.0449953
Non-anthroposophic	Female	4345	40	No	No			No	No			29	First	No	No	0.442479	0.0005	0.0005	0.0005	0.113597	0.0005	0.0525178	0.0005	0.152361	0.616026	0.0005	0.0005
Partly anthroposophic	Female	3485	39	No	No	No	No		No	No	No	29	First	No	No	1.08635	0.711567	0.482982	0.0307199	0.728483	1.03062	1.02074	0.00388472	0.0005	0.161217	1.12453	0.251125
Non-anthroposophic	Male	3385	40	Yes	Yes	Yes	Yes	No	No	No	No	35	Second	No	No	0.222212	0.410421	0.0005	0.0210779	0.488436	0.880389	0.0005	0.0005	0.216219	0.126893	0.0005	0.0005
Partly anthroposophic	Female	4195	42	No	No	No		Yes	Yes	No		27	First	No	No	0.277723	0.602897	0.301501	0.0116578	0.0208934	0.376914	0.0005	0.00619889	0.129326	0.192643	0.264179	0.202193
Non-anthroposophic	Female	2710	37									32	Fourth	No	No	0.579735	0.381972	0.0005	0.0302996	0.111901	0.538988	0.0005	0.0104083	0.553377	0.0408176	5.70007	0.435555
Partly anthroposophic	Male	3650	40									29		No	No	0.812464	0.531537	0.557457	0.229319	0.772341	1.59554	0.389575	0.158425	0.0005	0.0751982	0.790717	0.366055
Non-anthroposophic	Female	3770	37	Yes	Yes	Yes	Yes	Yes	Yes	Yes	Yes	28	Second	No	No	0.114116	0.29069	0.022858	0.0005	0.0005	0.639529	0.0005	0.0005	0.0140985	0.0270162	0.352323	0.232742
Non-anthroposophic	Female	3570	40		No	No			No	No		31	Second	Yes	No	1.15096	0.703559	0.0005	0.20817	0.0600973	1.75884	1.67833	0.138423	5.0191	0.603244	1.67833	0.138423
Partly anthroposophic	Female	3950	40								No	34	Second	No	Yes	2.23869	0.755937	0.0110237	0.108047	0.885358	1.44177	1.03111	0.232998	2.77775	0.0994081	1.03111	0.232998
Non-anthroposophic	Female	4382	38	No		No		No		No		32	First	Yes	No	0.335173	0.373713	0.305616	0.101292	1.31889	2.39552	0.214465	0.260463	0.0005	0.0994853	0.214465	0.260463
Partly anthroposophic	Female	3540	40	No	No	No	No	No	No	No	No	20	Second	No	No	0.0005	0.693961	0.0005	0.221755	0.8077	2.59596	0.0005	0.244143	2.75662	0.323233	0.0005	0.244143
Anthroposophic	Male	3355	40	No				No				30	First	No	Yes	1.86349	0.657833	0.193161	0.012427	0.44007	1.00089	0.0005	0.831371	0.0005	0.00669159	0.0005	0.831371
Partly anthroposophic	Male	3630	39		No	No			No			33	Second	No	Yes	2.3182	0.287126	2.42994	0.0681307	2.34696	0.842861	1.34089	0.00442409	0.0005	0.0005	1.34089	0.00442409
Partly anthroposophic	Female	3080	37	No	No	No		No	No	No		23	First	No	Yes	0.350537	0.449658	0.0005	0.0005	0.206252	4.44065	0.0005	0.0005	0.0463088	0.182978	0.0005	0.0005
Anthroposophic	Female	3515	39	No			No	No			No	23	Second	No	No	0.232806	0.302864	0.0005	0.0005	0.48646	1.24805	0.312883	0.118728	0.0005	0.0138975	0.312883	0.118728
Anthroposophic	Female	3600	43			No	No			No	No	18	Second	No	Yes	0.0005	0.225602	0.0005	0.0005	0.0121634	1.61245	0.0005	0.0429179	0.112642	0.329244	0.0005	0.0429179
Non-anthroposophic	Female	3395	39		No		Yes		No		No	32	Second	Yes	No	1.64951	0.426461	0.255544	0.0005	0.970798	2.07741	2.46146	0.158994	1.10957	0.0910336	2.46146	0.158994
Anthroposophic	Female	3760	39	No				No				27	Third	No	No	0.368696	0.589531	0.0923788	0.02528	0.452157	2.50189	1.54395	0.81257	0.035111	0.00846346	1.54395	0.81257
Partly anthroposophic	Male	4080	40			No				No		40	First	No		0.706769	0.218507	0.0005	0.0005	0.929955	0.886311	0.0005	6.79397	0.887433	0.0792848	1.37502	0.0693123
Partly anthroposophic	Female	3675	40									32	Second	No	No	1.24452	0.263954	0.218455	0.0227555	1.00704	1.52802	1.6829	0.0784569	1.13999	0.290928	1.6829	0.0784569
Partly anthroposophic	Male	3133	41									29	First	Yes	No	1.72144	0.374372	0.503478	0.0139734	2.51133	1.4466	2.42834	0.193372	1.78002	0.338223	2.42834	0.193372
Partly anthroposophic	Male	3400	38		No	No	No		No	No	No	33	Second	No	No	1.65744	0.986512	0.374973	0.409301	0.534812	4.18276	1	1	0.483652	1.25616	1.93976	3.68538
Non-anthroposophic	Female	3020	41			No	Yes			No	Yes	41	First	No	Yes	0.14906	0.485431	0.0718053	0.0620026	0.10023	2.03308	0.0394528	0.00688038	0.035462	0.0297803	0.015951	0.0202247
Non-anthroposophic	Male	3590	41	No	No	No		No	No	No		33	Second	Yes	No	1.64597	2.01216	0.560806	0.128421	2.06514	1.64175	1	1	5.18548	1.60768	1.4094	2.20979
Partly anthroposophic	Male	4200	40	No		No		No		No		25	Second	No	Yes	0.412431	1.2836	0.284038	0.184493	1.03449	1.36899	1	1	0.0448435	0.108025	1.10693	2.28019
Partly anthroposophic	Male	3470	38		No	No	No		No	No	Yes	31	First	Yes	No	0.0559501	0.0005	0.0614292	0.0381732	0.0679757	0.0969312	0.0005	0.0005	0.0216914	0.0005	0.0193721	0.0005
Partly anthroposophic	Male	3490	39	No		No	No			No	No	38	Second	No	No	3.79027	3.13797	0.0005	0.420597	1.8469	0.0005	0.999999	1	3.70383	6.54947	0.0005	1.48765
Partly anthroposophic	Female	2935	39		No	No			No	No		38	First	No	Yes	1.68184	1.91887	0.0596471	0.0636315	0.833447	0.627561	1	1	0.945854	0.143585	4.557	2.20737
Partly anthroposophic	Female	3440	42	No		No	No	No		No	No	27	First	No	No	1.8454	3.93395	0.352441	0.225613	0.942257	6.38048	1	1	4.16599	3.43775	0.735329	0.769299
Non-anthroposophic	Female	2940	39			No	No			No	No	34	Third	Yes		3.63398	1.83178	0.338201	0.151119	1.97869	2.26848	1	1	0.386594	2.78189	0.0005	7.1343
Anthroposophic	Male	2830	38	No	No	Yes	No	No	No	No	No	31	Second	No	Yes	0.746619	1.35611	0.470023	0.183175	1.48892	0.784626	1	1	1.20072	1.21382	0.58533	1.32905
Partly anthroposophic	Male	3870	41	No	No	No	No	No	No	No	No	33	First	No	Yes	1.77888	0.733571	0.577309	0.185974	1.56017	0.670714	1	1	1.2594	0.531061	0.0005	2.64917
Non-anthroposophic	Female	4490	40		No				No			26	Third	Yes	Yes	2.93285	1.92747	0.155469	0.0440395	0.845733	0.801005	1	1	0.95108	1.14611	6.21734	4.58285
Non-anthroposophic	Female	3410	39	No	No	No	No	No	No	No	No	30	First	No	Yes	0.0005	0.223535	0.258059	0.0214986	1.10465	1.17289	0.13818	0.00615141	0.177578	0.0337442	0.841868	0.251336
Non-anthroposophic	Female	3510	40	No	No	No	No	No	No	No	Yes	31	Third	Yes	No	2.63519	0.385871	0.168128	0.017484	0.632	1.28277	0.264658	0.0117615	0.191159	0.0517294	1.00369	0.235527
Partly anthroposophic	Female	3415	40	No	Yes	No	No	No	No	No	Yes	38	Second	Yes	No	0.0005	0.0005	0.0005	0.0339495	0.288581	1.23684	0.0005	0.0005	0.025317	0.0101671	0.0102503	0.0865407
Partly anthroposophic	Female	4250	43	No	Yes	No		No	No	No		32	First	Yes	No	1.19391	1.12216	0.282993	0.0676708	1.48247	1.83241	1	1	1.33009	0.669849	8.33525	4.76487
Anthroposophic	Male	2550	39				No				No	22	Third	No	No	0.0005	0.0005	0.0988127	0.270183	0.26632	0.151494	0.0696266	0.0632938	0.0005	0.0174422	0.0580924	0.0005
Partly anthroposophic	Female	3725	40	No	No	No	No	No	No	No	No	25	First	No	Yes	0.879497	0.0005	0.734696	0.0844942	0.940008	0.0471527	0.581557	0.0118585	0.852441	0.0403282	0.933893	0.0276028
Partly anthroposophic	Female	3750	37	No	No	No	Yes	No	No	No	No	34	Third	Yes	Yes	0.11614	0.31649	0.0005	0.0005	0.0699878	1.52408	0.115936	0.0256637	0.0540935	0.0428502	0.113947	0.107115
Partly anthroposophic	Male	3210	40	No	No	No	No	No	No	No	No	30	First	No	No	1.9842	0.511867	1.36795	0.228095	0.454913	0.529214	1.36795	0.228095	0.419211	0.177785	2.99971	0.998571
Non-anthroposophic	Male	3280	38	No	No	No		No	No	No		28	First	No	Yes	1.86508	0.451536	0.826544	0.183072	0.742953	1.30954	0.826544	0.183072	4.18817	0.428854	5.23528	0.418474
Anthroposophic	Female	3370	39									22	Second	No	No	2.68556	1.24534	1.57552	0.532986	0.204431	1.64389	1.57552	0.532986	0.179346	0.661335	0.25902	0.515777
Partly anthroposophic	Female	4200	40	No	No	No	No	No	No	No	No	30	Third	Yes	No	0.930545	0.211151	0.202072	0.0143676	1.21562	1.13461	0.0005	0.0005	1.30092	0.0460379	0.0005	0.0005
Anthroposophic	Female	3700	40	No	No	No	No	No	No	No	No	30	Fourth	No	Yes	1.86949	2.03872	0.309264	0.973622	2.43148	2.07971	0.309264	0.973622	1.87403	0.622574	1.53551	2.99533
Partly anthroposophic	Female	3650	40	No	No	Yes	Yes		No	Yes	No	38	Second	No	No	3.17498	0.959739	1.73427	0.484884	0.217136	0.368245	1.73427	0.484884	1.76219	0.538733	4.26575	0.0515663
Anthroposophic	Male	3390	38	No	No	No	No	No	No	No	Yes	33	Second	No	Yes	0.261134	0.87096	0.233548	0.157897	0.341926	4.67698	0.0246481	0.0005	0.0652747	0.130251	0.285734	0.856451
Partly anthroposophic	Male	3200	38	No				No				29	First	Yes	No	1.89097	1.95921	0.995633	0.888785	3.37672	3.48019	0.995633	0.888785	0.174105	0.198038	1.96999	1.226
Partly anthroposophic	Male	3310	39	No	No	No		No	No	No		28	First	No	Yes	3.16719	1.74836	1.01003	0.198866	1.33456	1.38403	1.01003	0.198866	0.0005	0.0520322	0.0005	0.0005
Partly anthroposophic	Male	3730	41	No	No	Yes	No	No	No	No	No	38	Third	No	No	0.0005	1.47469	0.0005	0.124563	0.0005	2.95075	0.0005	0.124563	0.0005	0.296788	3.03383	0.321849
Partly anthroposophic	Male	2965	37	No	No		No	No	No		Yes	36	Third	No	Yes	3.87678	8.60441	1.52789	0.829279	4.61154	9.46178	0.373739	0.302176	3.16424	1.88177	1.23266	1.71787
Partly anthroposophic	Male	3500	37	No				No				29		Yes	No	0.0005	0.380074	0.0005	0.0952822	0.152434	0.909125	0.0005	0.0952822	3.38898	0.338313	0.0005	0.320863
Partly anthroposophic	Female	3675	41	No	No	No	Yes	No	No	No	No	25	First	No	No	1.66689	0.868251	0.52147	0.204396	0.593947	1.57932	0.52147	0.204396	0.0145668	0.00969377	0.0824735	0.0894566
Partly anthroposophic	Female	4270	42	No	No		No	No	No		No	31	Third	No	Yes	0.0005	0.238504	0.0829071	0.0270692	0.323963	1.03344	0.0829071	0.0270692	2.10598	3.20035	0.0748985	0.0100205
Anthroposophic	Female	4085	42	No	No	No		No	No	No		33	First	No	No	0.911963	0.77735	1.13989	1.29803	0.0355667	0.774548	1.13989	1.29803	0.0153833	0.0167959	2.04629	0.0434156
Anthroposophic	Male	4050	41		No	No			No	No		20	First	No	No	3.71477	0.319536	0.0666659	0.0307375	0.137221	1.26138	0.0666659	0.0307375	1.94547	0.392857	0.0005	0.007976
Partly anthroposophic	Female	2665	38	No			Yes	Yes			No	29	First	No	No	0.0005	0.0005	0.657567	0.194398	0.898659	1.48311	0.657567	0.194398	0.0005	0.0005	0.617728	0.562156
Anthroposophic	Male	4550	41	No		No	No	No		No	No	27	Third	No	Yes	0.243473	0.572577	0.0005	0.0005	0.622707	2.68709	0.0005	0.0005	0.281614	0.0005	0.0005	0.0594977
Non-anthroposophic	Female	3430	38	Yes	Yes	Yes	Yes	No	No	No	No	30	Second	No	No	0.0005	0.238504	0.0829071	0.0270692	0.323963	1.03344	0.0829071	0.0270692	2.10598	3.20035	0.0748985	0.0100205
Non-anthroposophic	Female	2850	41	No	No	No		No	No	No		23	First	Yes	Yes	0.911963	0.77735	1.13989	1.29803	0.0355667	0.774548	1.13989	1.29803	0.0153833	0.0167959	2.04629	0.0434156
Partly anthroposophic	Male	3520	39	No	No	No		No	No	No		34	Second	No	Yes	3.71477	0.319536	0.0666659	0.0307375	0.137221	1.26138	0.0666659	0.0307375	2.50106	0.392857	0.0005	0.007976
Partly anthroposophic	Female	4340	42	No	No	No	No	No	No	No	No	35	Second	No	No	0.0005	0.0005	0.657567	0.194398	0.898659	1.48311	0.657567	0.194398	0.0005	0.444765	0.617728	0.562156
Partly anthroposophic	Male	3380	41	No	No	No	No	No	No	No	No	37	Third	No	Yes	0.243473	0.572577	0.0005	0.0005	0.622707	2.68709	0.0005	0.0005	0.281614	0.0005	0.0005	0.0594977
Partly anthroposophic	Male	3585	41	No		No		No		No		35	First	No	Yes	0.0250525	2.10035	0.0005	0.985755	0.0005	0.0005	0.0005	0.0466294	0.716057	0.724232	0.0005	0.0005
Partly anthroposophic	Male	3525	39	No	No	No				No		37	Second	No	Yes	0.0507084	0.0005	0.0005	0.0005	0.0005	0.0005	0.0005	3.25848	0.0005	0.0005	0.0005	0.0005
Non-anthroposophic	Male	3450	39		Yes	Yes	No		Yes	Yes	No	23	First	No	No	0.0005	0.0005	0.0005	0.0005	0.0152942	5.08102	0.0005	0.0005	7.15221	0.0005	0.0005	0.582337
Partly anthroposophic	Female	3005	41	No		No		No		No		31	First	No	Yes	0.0005	0.0005	0.0005	0.0005	0.0160433	0.0005	0.0005	0.0005	0.0005	5.08472	0.0005	0.0005
Partly anthroposophic	Male	3420	39	Yes	Yes	Yes	No		No	Yes	Yes	30	First	No	Yes	0.127182	4.14161	0.017642	0.214175	0.125409	1.98678	0.0133181	0.0737893	0.0440446	0.322824	0.367444	2.39475
Partly anthroposophic	Female	3900	40		No	No	No		No	No	No	31	Third	No	No	0.0005	0.0005	0.0138872	0.0005	0.0005	0.0005	0.0005	0.529739	0.199917	1.02483	0.0005	0.0472757
Partly anthroposophic	Male	3850	41	No	Yes	Yes	No	No	No	No	Yes	37	Third	No		1.41821	5.21861	0.325168	0.736769	0.907465	0.0005	0.102041	1.58601	0.396049	3.09883	0.73854	2.99689
Partly anthroposophic	Female	3075	41		No	No			No	No		28	First	Yes	Yes	0.0005	0.392163	0.0005	0.0809969	0.0005	0.0005	0.523901	0.780962	0.0005	0.0005	0.0005	0.0005
Non-anthroposophic	Female	3520	39		No	No	No		No	No	No	28	First	No	No	0.0005	0.0005	0.0005	0.0005	0.0005	0.0005	0.0005	0.0005	0.761049	1.42424	0.0005	0.0005
Partly anthroposophic	Female	3900	41	No	No	No	No	No	No	No	No	21	Third	No	No	9.24226	2.04296	0.0005	0.0005	0.0005	0.0005	1.48117	0.252493	0.0005	0.0398728	0.0005	0.0668759
Non-anthroposophic	Female	4070	38		No	No	No		No	No	Yes	37	Fourth	No	Yes	1.96086	0.490431	1.4682	0.0856349	0.0005	0.0005	0.0005	0.0561578	0.0005	0.194151	0.0005	0.0005
Non-anthroposophic	Female	3545	40									20	First	No		0.529764	0.423452	0.673987	0.01698	0.0005	0.0005	0.0005	0.0443759	0.0005	0.0680433	0.0005	0.0143024
Anthroposophic	Male	3160	41	No	No	No	No	No	No	No	No	42	Second	Yes	No	4.83273	1.10078	0.0005	0.0005	0.0005	0.0005	0.0005	0.167375	9.47169	0.458251	0.0005	0.0005
Partly anthroposophic	Male	3305	40	No	No	No	No	No	No	No	No	34	First	Yes	Yes	8.00487	2.27326	2.48476	0.535029	0.0005	0.0005	1.33997	0.524078	0.0229293	0.151406	0.587591	0.653981
Partly anthroposophic	Female	4200	41									37	Third	No	Yes	0.0005	0.75648	0.0005	0.0249315	0.0005	0.0005	0.0309971	0.113331	0.0005	0.0005	0.506546	0.110552
